# Supplementary figures and images for: Immunodetection of Truncated Forms of the α6 Subunit of the nAChR in the Brain of Spinosad Resistant Ceratitis capitata Phenotypes
Source: MDPI journal article supplement (doi:10.3390/insects14110857), 2023-11-04

Supplementary Figure S2

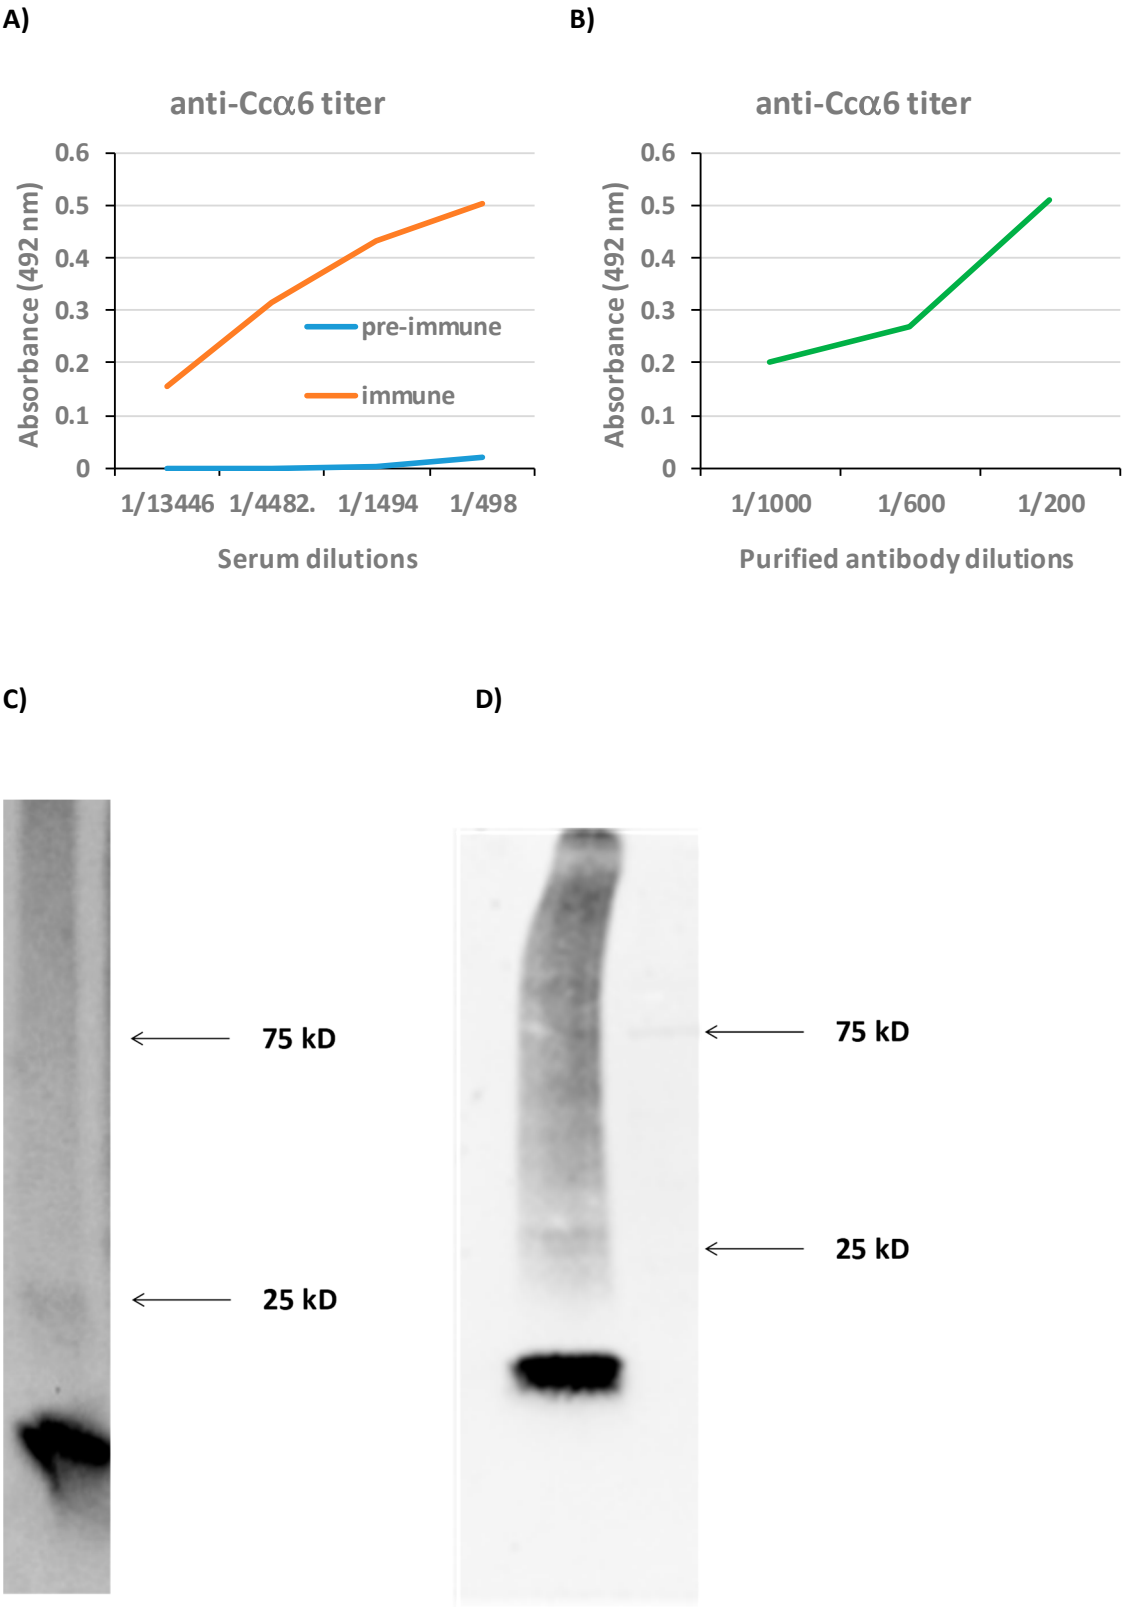

Supplement: s1 [file s1]
